# Supplementary material
Source: PubMed Central journal article supplement (PMC544916)
Supplement: 7600504s1.pdf [file 7600504s1.pdf]

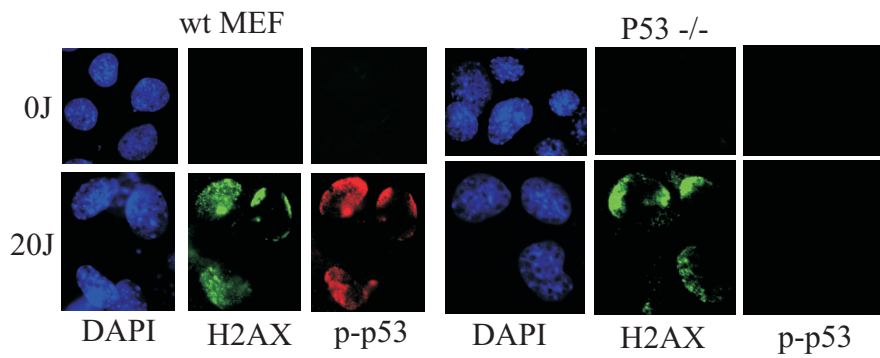

**Supplementary figure 1. The p-p53 antibody is specific.**

Wild type and p53<sup>-/-</sup> mouse embryonic fibroblasts were treated with the indicated dose of UV and analysed by IF using anti-p53 and -H2AX phosphospecific antibodies 2 h post irradiation. No p-p53 signal is detected in either untreated or H2AX positive cells in the p53<sup>-/-</sup> MEFs, demonstrating the specificity of the antibody.
