# Supplementary material
Source: PubMed Central journal article supplement (PMC544916)
Supplement: 7600504s2.pdf [file 7600504s2.pdf]

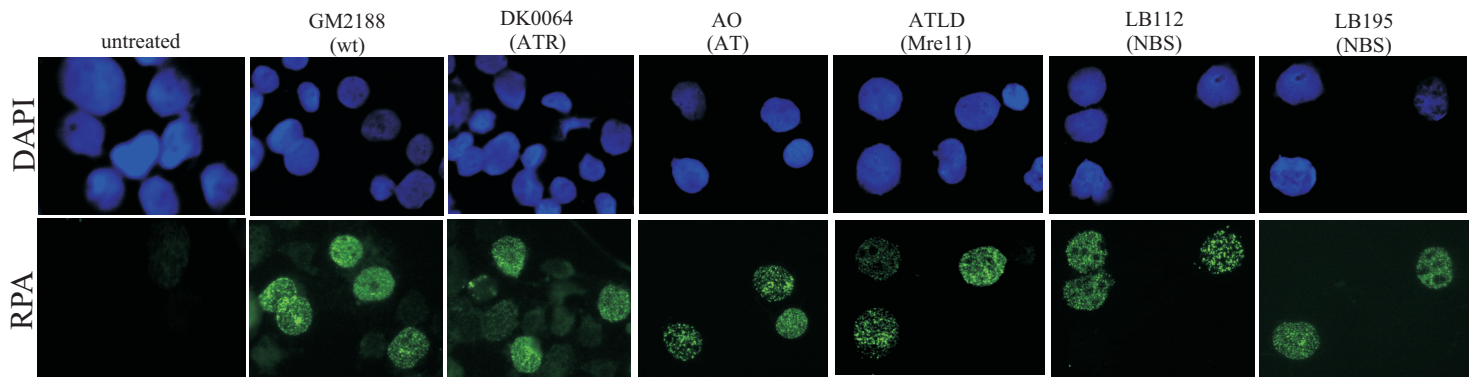

**Supplementary figure 2. RPA is recruited normally to the sites of damage in NBS and ATR-Seckel LBL.**

The indicated LBLs were either untreated or treated with 2 mM HU for 2 h and processed with mild permeabilised and extraction (0.1% Triton X-100, 30 sec) and IF using -RPA. Only untreated control cells are shown. All other untreated cells gave a similar lack of signal. RPA is recruited normally in all cells lines examined.
