# Supplementary material
Source: PubMed Central journal article supplement (PMC544916)
Supplement: 7600504s3.pdf [file 7600504s3.pdf]

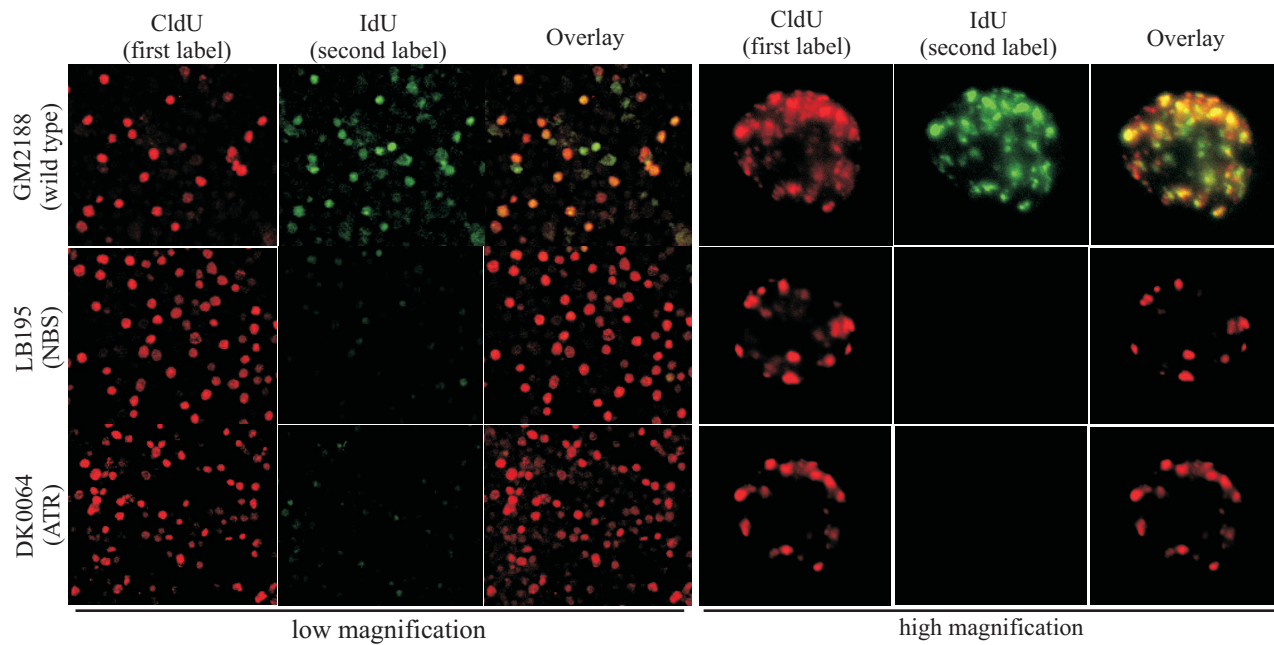

**Supplementary figure 3. ATR and NBS cells show impaired recovery of DNA synthesis at stalled replication forks.**

The indicated cells were labelled with CldU and incubated with 10  $\mu$ M aphidicolin for 2 h, then incubated with IdU in the presence of  $\mu$  aphidicolin. Fork progression was allowed to restart for 10 minutes, then processed for detection of the labels by indirect immunofluorescence. CldU and IdU were detected with red and green secondary antibodies, respectively. Control cells show extensive replication recovery evident from the presence of the cells labelled in green and by the overlap of red and green labelling. In contrast, NBS and ATR cells show little green labelling, indicative of a failure to restart replication at the stalled replication forks.

Representative cells are shown at low (x10) and high (x100) magnifications; regions of red and green overlap are artificially coloured yellow.
